# Supplementary material
Source: PubMed Central journal article supplement (PMC4833839)
Supplement: mmc1.pdf [file mmc1.pdf]

**Biophysical Journal, Volume 110**

**Supplemental Information**

**Density-Dependent Differentiation of Bacteria in Spatially Structured  
Open Systems**

**Jan Ribbe and Berenike Maier**

**Biophysical Journal**

**Supporting Material**

**Density-Dependent Differentiation of Bacteria in Spatially Structured Open Systems**

Jan Ribbe<sup>1</sup> and Berenike Maier<sup>1,\*</sup>

<sup>1</sup>Department of Physics, University of Cologne, Cologne, Germany

Bacterial Differentiation in Structured Systems

9 **SUPPLEMENTARY FIGURES**

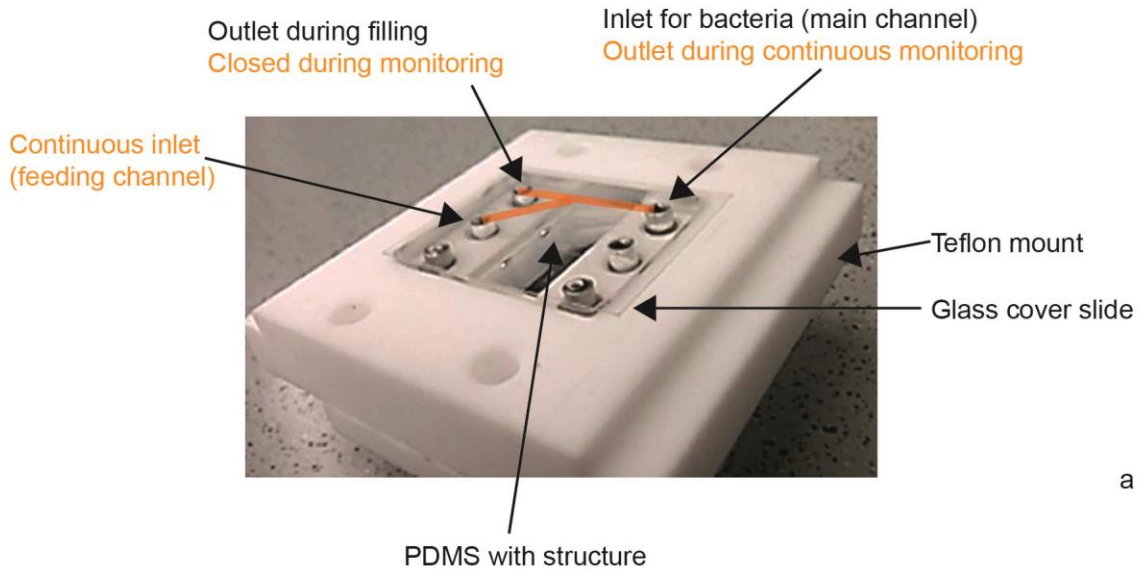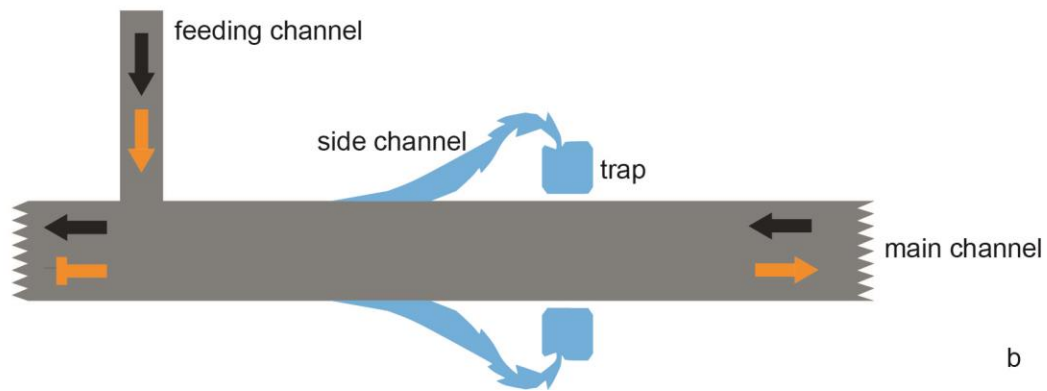

10

11 **FIGURE S1** Microfluidic device. a) Photograph of microfluidic chamber. The teflon frame serves

12 as mount for the microscope. The master defining the microstructures is mounted onto the teflon

13 frame prior to casting of PDMS. After the curing process, cleaning and cutting, the master is

14 replaced by a glass cover slide. The orange lines denote the location of the main channel and the

15 feeding channel. b) Strategy for filling the channel and for avoiding pollution of fresh medium

16 with bacteria. Phase 1 (black arrows): Medium with bacteria is fed into the main channel.

17 Medium is applied to the feeding channel. The left end of the main channel serves as outlet.

18 Phase 2 (orange arrows): Once enough bacteria have settled within the side channels, the flow

19 direction within the main channel is reversed by closing the left end of the main channel. The

20 right end of the main channel serves as outlet.

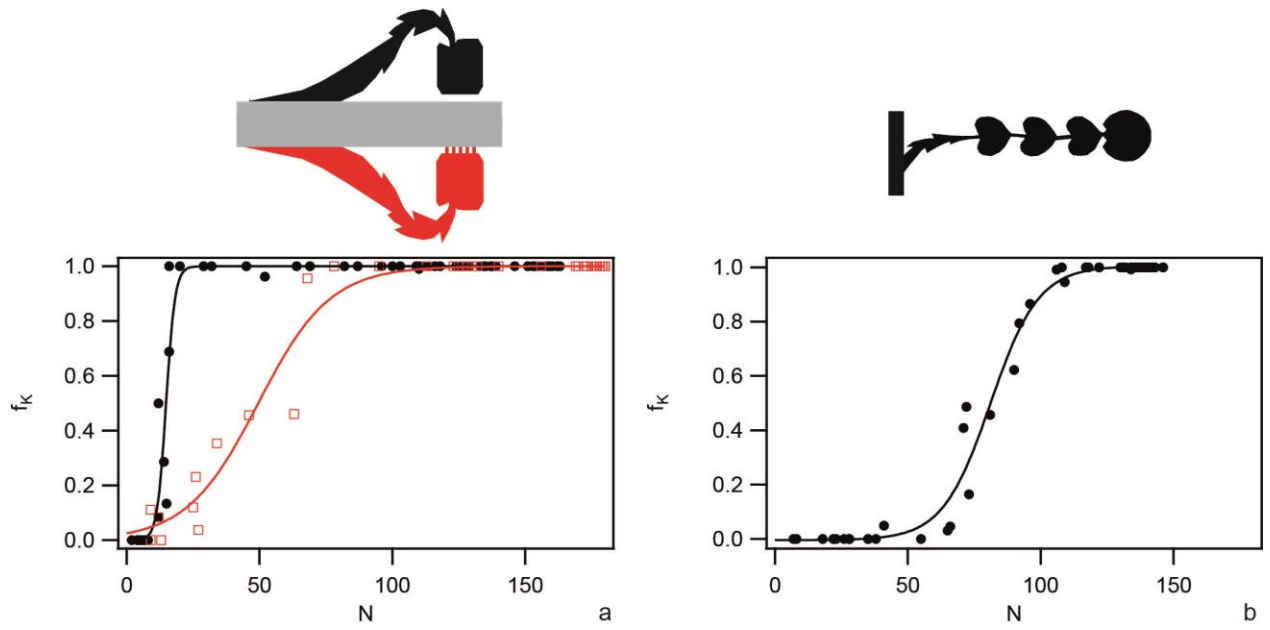

21

22

23 FIGURE S2 Determination of  $N_{half}$ . The fractions of competent cells  $f_K$  as a function of total  
 24 number  $N$  per trap were plotted. Typical examples for individual traps for a) strong (red) and  
 25 medium (black), and b) weak coupling. Full lines: Fit to  $f_K(N) = f_K^{max} / (1 + e^{-(N-N_{half})/\mu})$ .

26

27
